# Supplementary material
Source: HighWire-hosted journal article supplement (http://www.jneurosci.org/highwire/filestream/599005/field_highwire_adjunct_files/1/Supplemental_Legend.pdf)
Supplement: Supplemental_Legend.pdf [file Supplemental_Legend.pdf]

**Supplementary Data. Single-cell immunofluorescence demonstrates that exogenous SNAP-25 is expressed at levels ~7-fold higher than endogenous SNAP-25.** Cells were transfected with either GFP alone or GFP fused to the N-terminus of SNAP-25 (TR mutant). The tissue was then fixed and probed with an antibody recognizing the N-terminus of SNAP-25. Transfection-positive cells were identified using 488 nm laser line excitation of GFP and then a 559 nm laser line was used to identify and quantify SNAP-25 expression levels by immunofluorescence. (A) Sample images with 559 nm excitation demonstrating that cells expressing TR SNAP-25 are more immunoreactive than cells expressing GFP only. (B) Bar graph summarizing the fluorescent ratio (SNAP-25/GFP) from the indicated number of cells.
